# Supplementary material for: Deletion of HP1γ in cardiac myocytes affects H4K20me3 levels but does not impact cardiac growth
Source: PubMed Central journal article supplement (PMC5905015; doi:10.1186/s13072-018-0187-z), 2018-04-17

Additional file 3: Fig. S2

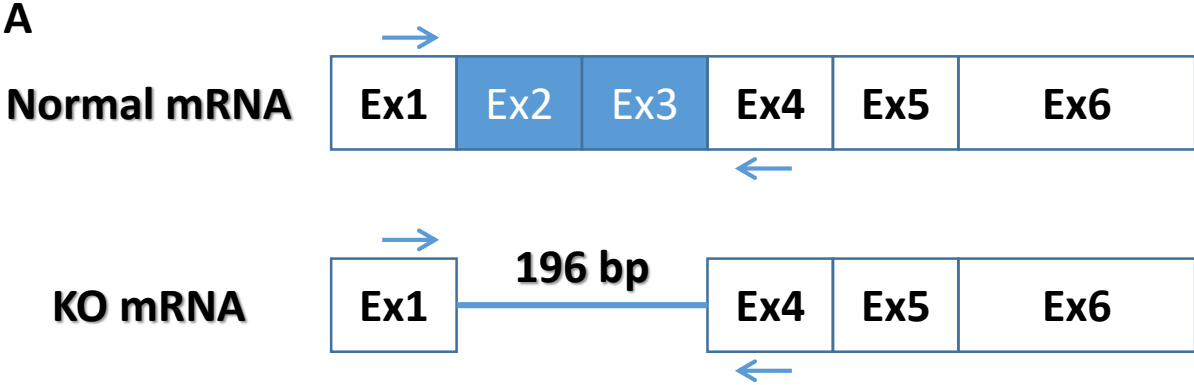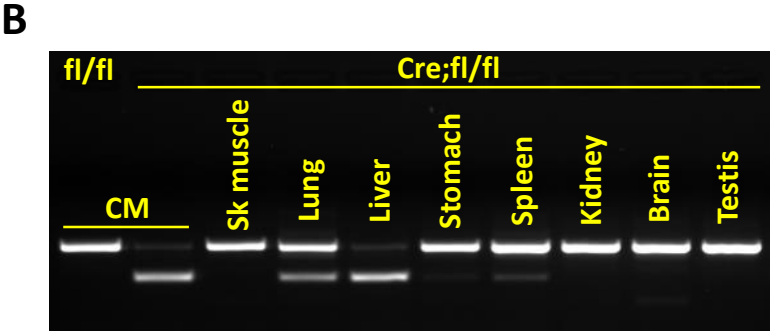

Supplement: 13072_2018_187_MOESM4_ESM.pdf [file 13072_2018_187_MOESM4_ESM.pdf]
