# Supplementary material for: Deletion of HP1γ in cardiac myocytes affects H4K20me3 levels but does not impact cardiac growth
Source: PubMed Central journal article supplement (PMC5905015; doi:10.1186/s13072-018-0187-z), 2018-04-17

**Additional file 13: Fig. S9**

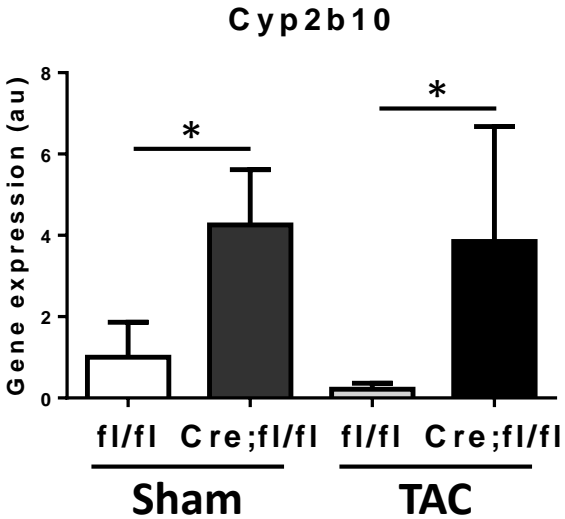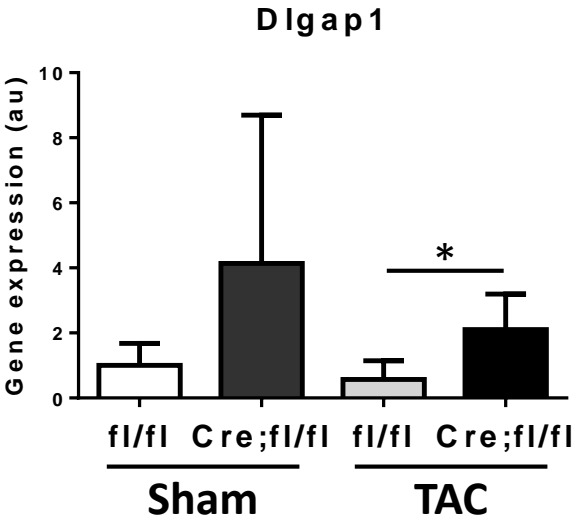

Supplement: 13072_2018_187_MOESM13_ESM.pdf [file 13072_2018_187_MOESM13_ESM.pdf]
